# Supplementary material for: The relative and attributable risks of cardia and non-cardia gastric cancer associated with Helicobacter pylori infection in China: a case-cohort study
Source: PubMed Central journal article supplement (PMC8646857; doi:10.1016/s2468-2667(21)00164-x), 2021-11-25
Supplement: mmc1.pdf [file mmc1.pdf]

# THE LANCET

## Public Health

### Supplementary appendix

This appendix formed part of the original submission and has been peer reviewed. We post it as supplied by the authors.

Supplement to: Yang L, Kartsonaki C, Yao P, et al. The relative and attributable risks of cardia and non-cardia gastric cancer associated with *Helicobacter pylori* infection in China: a case-cohort study. *Lancet Public Health* 2021; **6**: e888–96.

## SUPPLEMENTARY APPENDIX

**The relative and attributable risks of non-cardia and cardia gastric cancer associated with *H. pylori* infection in China: A case-cohort study.** Yang L, Kartsonaki C, Pang Y, et al.

| <b>Content List of Supplementary Materials</b>                                                                                                                                                                                       | <b>Page</b> |
|--------------------------------------------------------------------------------------------------------------------------------------------------------------------------------------------------------------------------------------|-------------|
| <b>eFigure 1.</b> Flow diagram of study design and participant selection                                                                                                                                                             | 2           |
| <b>eTable 1.</b> Criteria for determining <i>H. pylori</i> sero-positivity based on the HelicoBlot assay                                                                                                                             | 3           |
| <b>eTable 2.</b> Incidence rates of NCGC and CGC by sex and age in the whole CKB cohort                                                                                                                                              | 4           |
| <b>eTable 3.</b> The baseline characteristics of NCGC cases selected and not selected for the present study                                                                                                                          | 5           |
| <b>eTable 4.</b> Sero-status of <i>H. pylori</i> biomarkers and <i>H. pylori</i> infection in each study arm                                                                                                                         | 6           |
| <b>eTable 5.</b> <i>H. pylori</i> sero-status in each study arm by age, sex, area and education                                                                                                                                      | 7           |
| <b>eFigure 2.</b> Correlation coefficients of different <i>H. pylori</i> biomarkers among the 500 subcohort participants                                                                                                             | 8           |
| <b>eFigure 3.</b> Associations of <i>H. pylori</i> infection with risks of (a) non-cardia, and (b) cardia gastric cancer, with further stepwise adjustments for other risk factors                                                   | 9           |
| <b>eFigure 4.</b> Associations of <i>H. pylori</i> infection with risks of (a) non-cardia, and (b) cardia gastric cancer, in selected population subgroups                                                                           | 10          |
| <b>eTable 6.</b> Sero-prevalence and associations of <i>H. pylori</i> infection, defined by 'clinical criteria', with risks of gastric cancer                                                                                        | 11          |
| <b>eFigure 5:</b> Associations of sero-positivity of multiple key <i>H. pylori</i> biomarkers with risks of (a) non-cardia, and (b) cardia gastric cancer                                                                            | 12          |
| <b>eFigure 6.</b> Associations of <i>H. pylori</i> infection, overall and by individual biomarkers, with risk of oesophageal adenocarcinoma                                                                                          | 13          |
| <b>eTable 7.</b> Associations of <i>H. pylori</i> infection with risks of non-cardia and cardia gastric cancer by histopathological subtypes                                                                                         | 14          |
| <b>eFigure 7.</b> Associations of <i>H. pylori</i> infection with risks of non-cardia and cardia gastric cancer and oesophageal adenocarcinoma, with sero-ambiguous results included either as a) sero-negative, or b) sero-positive | 15          |
| <b>eFigure 8.</b> Associations of <i>H. pylori</i> infection, overall and by individual biomarkers, with risk of cardia gastric cancer (adjudicated cases only)                                                                      | 16          |
| <b>eTable 8.</b> The estimated numbers of cases attributable to <i>H. pylori</i> in China, from incremental exclusion of follow-up years data                                                                                        | 17          |

**eFigure1. Flow diagram of study design and participant selection**

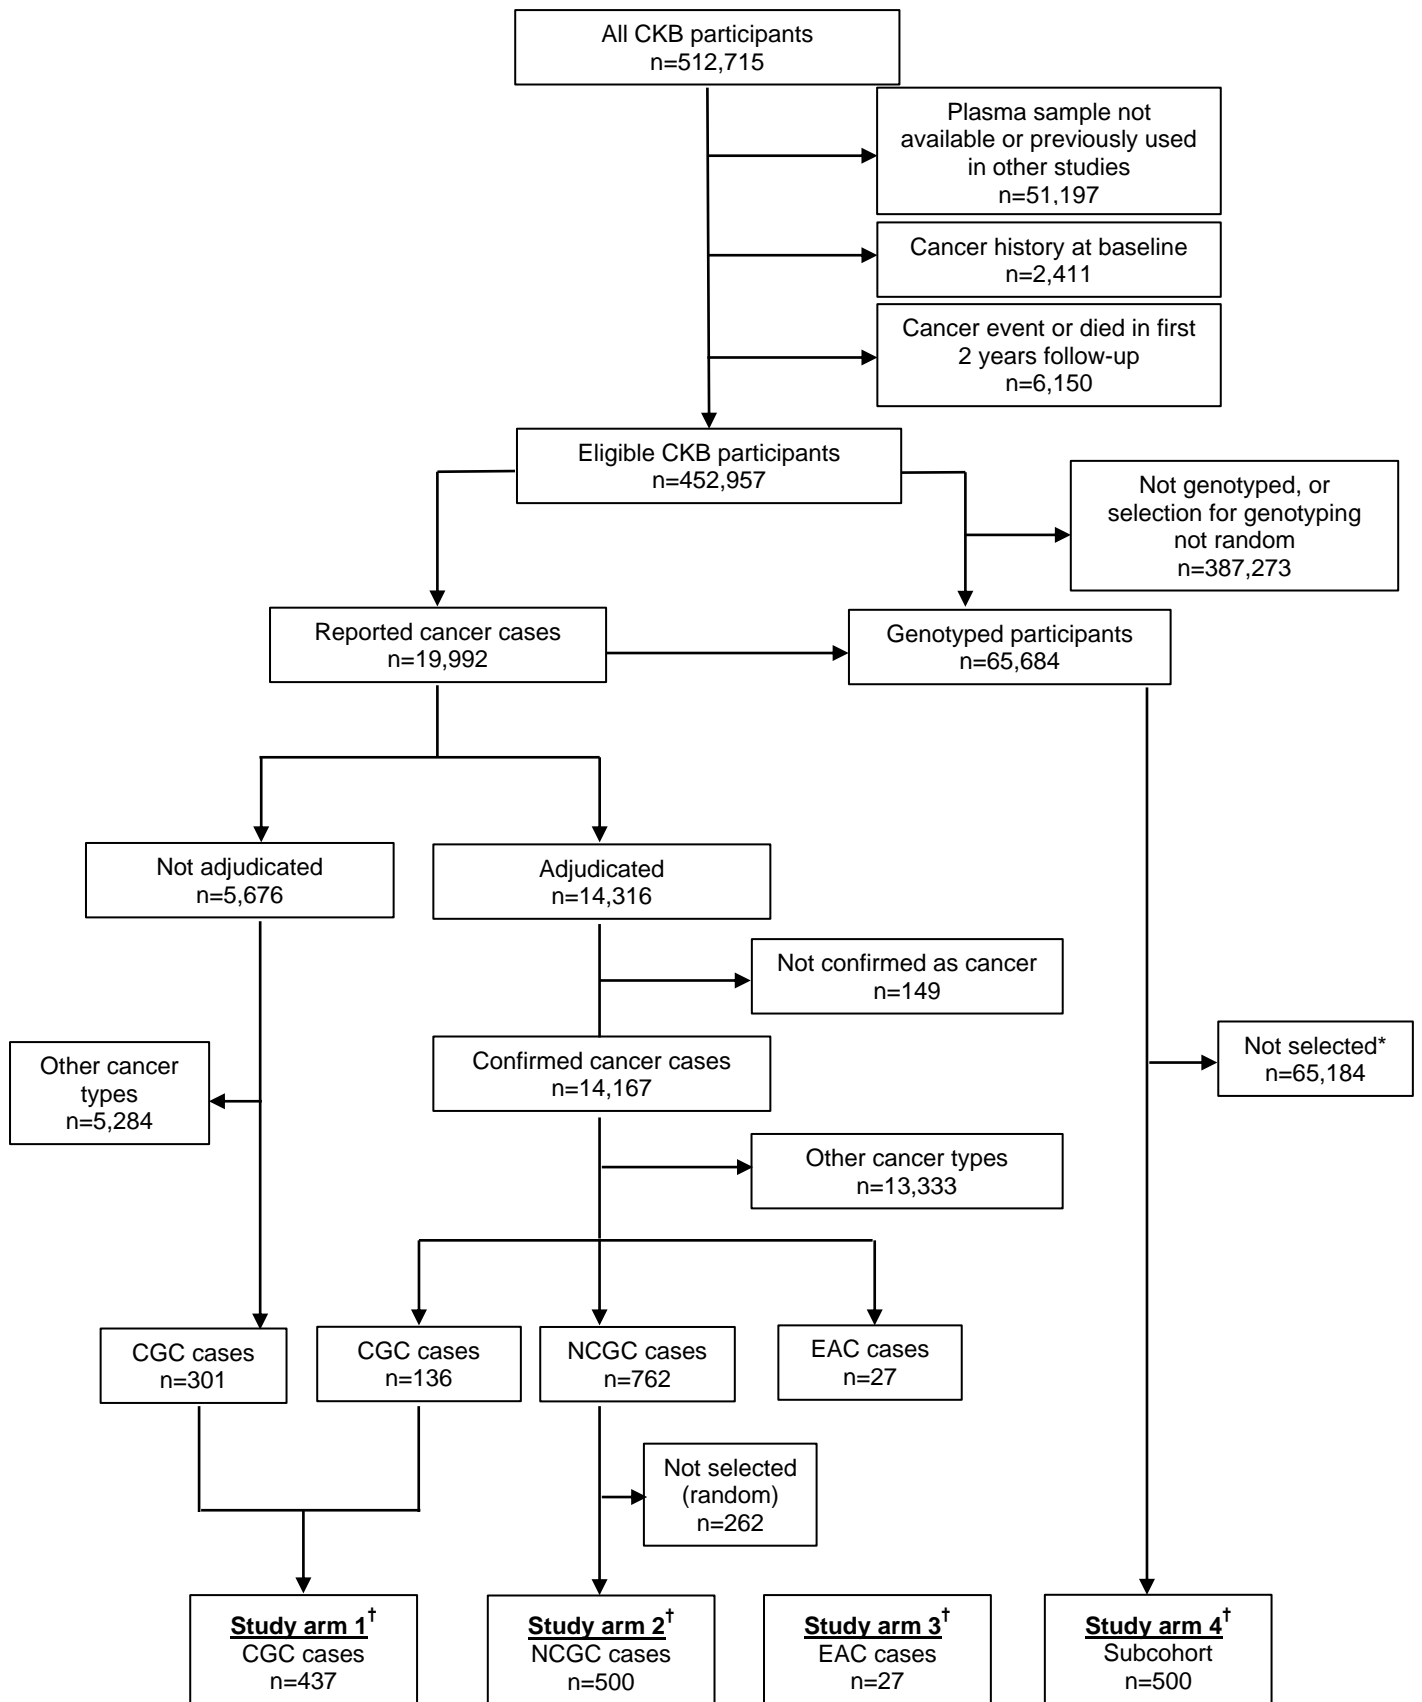

\*Selection for the subcohort used stratified random sampling based on the age and sex distribution of all selected CGC and NCGC cases combined; †Individuals may be included in more than one study arm; CKB: China Kadoorie Biobank; CGC: cardia gastric cancer; NCGC: non-cardia gastric cancer; EAC: oesophageal adenocarcinoma

**eTable 1. Criteria for determining *H. pylori* sero-positivity\* based on the HelicoBlot assay**

| Epidemiological criteria | Clinical criteria                       |
|--------------------------|-----------------------------------------|
| VacA, 37kD or 35kD       | VacA, 37kD or 35kD                      |
| <b>OR</b>                |                                         |
| UreA and 19.5kD          | UreA and 19.5kD                         |
| <b>OR</b>                |                                         |
| CagA                     | CagA and Current Infection Marker (CIM) |

\* If one or more bands are assessed as ambiguous (i.e. cannot be clearly determined as present or absent), this may result in an ambiguous assignment of *H. pylori* sero-status

**eTable 2. Incidence rates (per 100,000 person-years) of NCGC and CGC by sex and age in the whole CKB cohort**

| Sex            | Age (Years) | NCGC         |             | CGC          |             |
|----------------|-------------|--------------|-------------|--------------|-------------|
|                |             | No. of cases | Rate        | No. of cases | Rate        |
| Male           | 30-49       | 249          | 27.6        | 37           | 4.1         |
|                | 50-59       | 622          | 99.2        | 132          | 21.1        |
|                | 60-79       | 1032         | 200.4       | 233          | 45.3        |
| Female         | 30-49       | 206          | 14.2        | 11           | 0.8         |
|                | 50-59       | 324          | 34.2        | 49           | 5.2         |
|                | 60-79       | 496          | 78.0        | 73           | 11.5        |
| <b>Overall</b> |             | <b>2929</b>  | <b>57.6</b> | <b>535</b>   | <b>10.5</b> |

**eTable 3. The baseline characteristics of NCGC cases selected and not selected for the present study**

| <b>Characteristics*</b>                            | <b>Selected</b> | <b>Not selected</b> |
|----------------------------------------------------|-----------------|---------------------|
| Number of cases                                    | 500             | 1535                |
| Age (years), mean (SD)                             | 59.0 (9.5)      | 59.5 (9.8)          |
| Women, n (%)                                       | 173 (34.6)      | 575 (37.5)          |
| Urban residents, n (%)                             | 352 (70.4)      | 774 (50.4)          |
| ≥ 6 years of education, n (%)                      | 225 (45.0)      | 542 (35.3)          |
| Household income (≥ 20000 CNY/year), n (%)         | 232 (46.4)      | 525 (34.2)          |
| Current regular smoking, n (%)                     |                 |                     |
| Males                                              | 230 (70.3)      | 599 (62.4)          |
| Females                                            | 5 (2.9)         | 22 (3.8)            |
| Current regular alcohol, n (%)                     |                 |                     |
| Males                                              | 134 (41.0)      | 344 (35.8)          |
| Females                                            | 2 (1.2)         | 15 (2.6)            |
| MET h/day, mean (SD)                               | 19.5 (15.2)     | 18.8 (13.4)         |
| Poor self-rated health, n (%)                      | 46 (9.2)        | 196 (12.8)          |
| Diabetes (self-reported or screen-detected), n (%) | 32 (6.4)        | 110 (7.2)           |
| Prior peptic ulcer, n (%)                          | 31 (6.2)        | 99 (6.4)            |
| Prior cirrhosis/chronic hepatitis, n (%)           | 3 (0.6)         | 15 (1.0)            |
| Prior CHD/stroke/TIA, n (%)                        | 28 (5.6)        | 83 (5.4)            |
| Prior emphysema/bronchitis, n (%)                  | 12 (2.4)        | 52 (3.4)            |
| BMI (kg/m <sup>2</sup> ), mean (SD)                | 23.6 (3.4)      | 23.2 (3.4)          |
| Waist circumference (cm), mean (SD)                | 81.1 (10.1)     | 80.1 (10.0)         |
| SBP (mmHg) , mean (SD)                             | 135.3 (22.8)    | 135.4 (22.3)        |

**eTable 4. Sero-status of *H. pylori* biomarkers and *H. pylori* infection (%) in each study arm**

| <i>H. pylori</i> infection | NCGC (n=499) |            |            | CGC (n=436) |            |            | Subcohort (n=500) |             |            |
|----------------------------|--------------|------------|------------|-------------|------------|------------|-------------------|-------------|------------|
|                            | Positive     | Negative   | Amb.*      | Positive    | Negative   | Amb.*      | Positive          | Negative    | Amb.*      |
| CIM                        | 78.6         | 16.8       | 4.6        | 74.5        | 22.5       | 3.0        | 52.1              | 42.9        | 5.0        |
| 19.5kD                     | 16.2         | 78.4       | 5.4        | 14.4        | 81.2       | 4.4        | 9.4               | 87.4        | 3.2        |
| 30kD (UreaseA)             | 71.3         | 20.0       | 8.6        | 64.9        | 24.3       | 10.8       | 52.7              | 39.3        | 8.0        |
| 35kD                       | 22.0         | 69.3       | 8.6        | 17.9        | 73.2       | 8.9        | 17.8              | 77.2        | 5.0        |
| 37kD                       | 50.1         | 40.1       | 9.8        | 45.0        | 44.0       | 11.0       | 33.1              | 58.9        | 8.0        |
| 89kD (VacA)                | 64.5         | 25.1       | 10.4       | 59.4        | 29.4       | 11.2       | 43.3              | 47.1        | 9.6        |
| 116kD (CagA)               | 93.2         | 4.6        | 2.2        | 91.7        | 6.9        | 1.4        | 74.1              | 21.8        | 4.0        |
| <b>Overall</b>             | <b>94.4</b>  | <b>3.2</b> | <b>2.4</b> | <b>92.2</b> | <b>6.2</b> | <b>1.6</b> | <b>75.6</b>       | <b>20.2</b> | <b>4.2</b> |

\* Ambiguous results where the presence or absence of the band was not clear

**eTable 5. *H. pylori* sero-status (%) in each study arm, by age, sex, area and education**

|                     | NCGC (n=499) |          |       | CGC (n=436) |          |       | Subcohort (n=500) |          |       |
|---------------------|--------------|----------|-------|-------------|----------|-------|-------------------|----------|-------|
|                     | Positive     | Negative | Amb.* | Positive    | Negative | Amb.* | Positive          | Negative | Amb.* |
| <b>Age</b>          |              |          |       |             |          |       |                   |          |       |
| 30-49               | 96.6         | 2.3      | 1.1   | 95.0        | 5.0      | 0     | 77.1              | 21.4     | 1.4   |
| 49-59               | 96.7         | 1.7      | 1.7   | 93.2        | 4.7      | 2.0   | 74.1              | 22.4     | 3.4   |
| 60-79               | 91.8         | 4.8      | 3.5   | 91.1        | 7.3      | 1.6   | 76.2              | 18.4     | 5.5   |
| <b>Sex</b>          |              |          |       |             |          |       |                   |          |       |
| Men                 | 93.6         | 4.0      | 2.4   | 92.0        | 6.5      | 1.5   | 76.1              | 19.6     | 4.3   |
| Women               | 95.9         | 1.7      | 2.3   | 92.8        | 5.4      | 1.8   | 74.5              | 21.6     | 3.9   |
| <b>Area</b>         |              |          |       |             |          |       |                   |          |       |
| Rural               | 92.6         | 5.4      | 2.0   | 91.3        | 6.1      | 2.5   | 66.5              | 28.6     | 4.8   |
| Urban               | 95.2         | 2.3      | 2.6   | 93.7        | 6.3      | 0     | 84.5              | 11.9     | 3.6   |
| <b>Education</b>    |              |          |       |             |          |       |                   |          |       |
| Illiterate          | 95.1         | 2.5      | 2.5   | 93.6        | 4.6      | 1.8   | 76.6              | 19.1     | 4.3   |
| Primary school      | 90.1         | 6.6      | 3.3   | 93.0        | 5.9      | 1.1   | 65.6              | 26.5     | 7.9   |
| Secondary school    | 96.9         | 1.6      | 1.6   | 88.9        | 10.1     | 1.0   | 82.8              | 15.6     | 1.6   |
| High school or more | 96.9         | 1.0      | 2.1   | 92.9        | 2.4      | 4.8   | 85.3              | 14.7     | 0     |
| <b>Overall</b>      | 94.4         | 3.2      | 2.4   | 92.2        | 6.2      | 1.6   | 75.6              | 20.2     | 4.2   |

\* Ambiguous results where the presence or absence of the band was not clear



**eFigure 2. Correlation coefficients of different *H. pylori* biomarkers among the 500 subcohort participants**

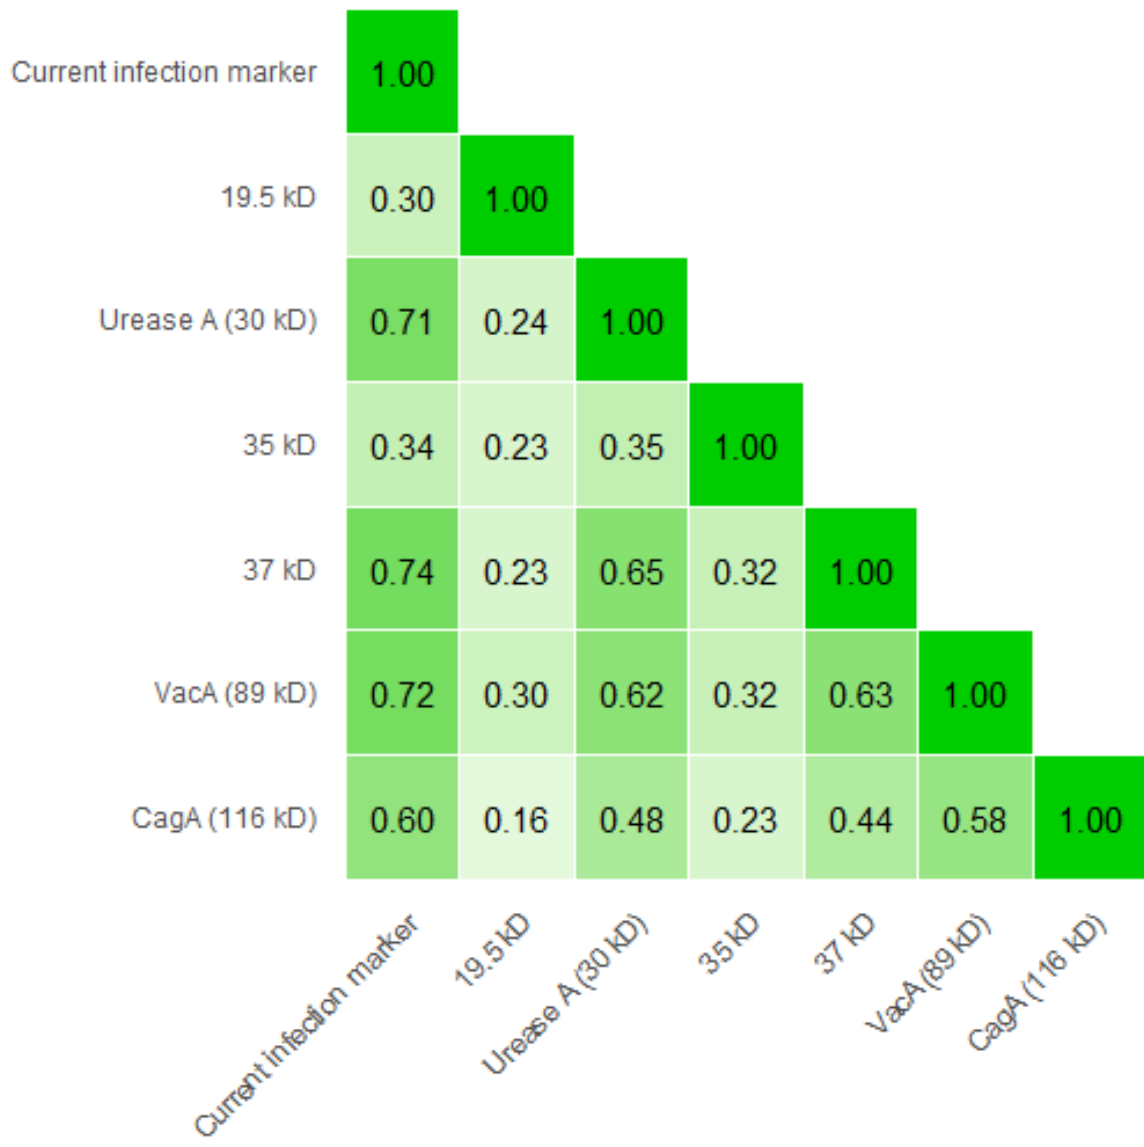

**eFigure 3. Associations of *H. pylori* infection with risks of (a) non-cardia, and (b) cardia gastric cancer, with further stepwise adjustments for other risk factors**

The Borgan III method was used to estimate HRs with time in study as the time scale. The squares represent adjusted HRs, and the horizontal lines represent 95% CIs. The area of the squares is inversely proportional to the variance of the log HRs. The dietary factors included preserved vegetables, fresh fruits, spicy food and soybeans.

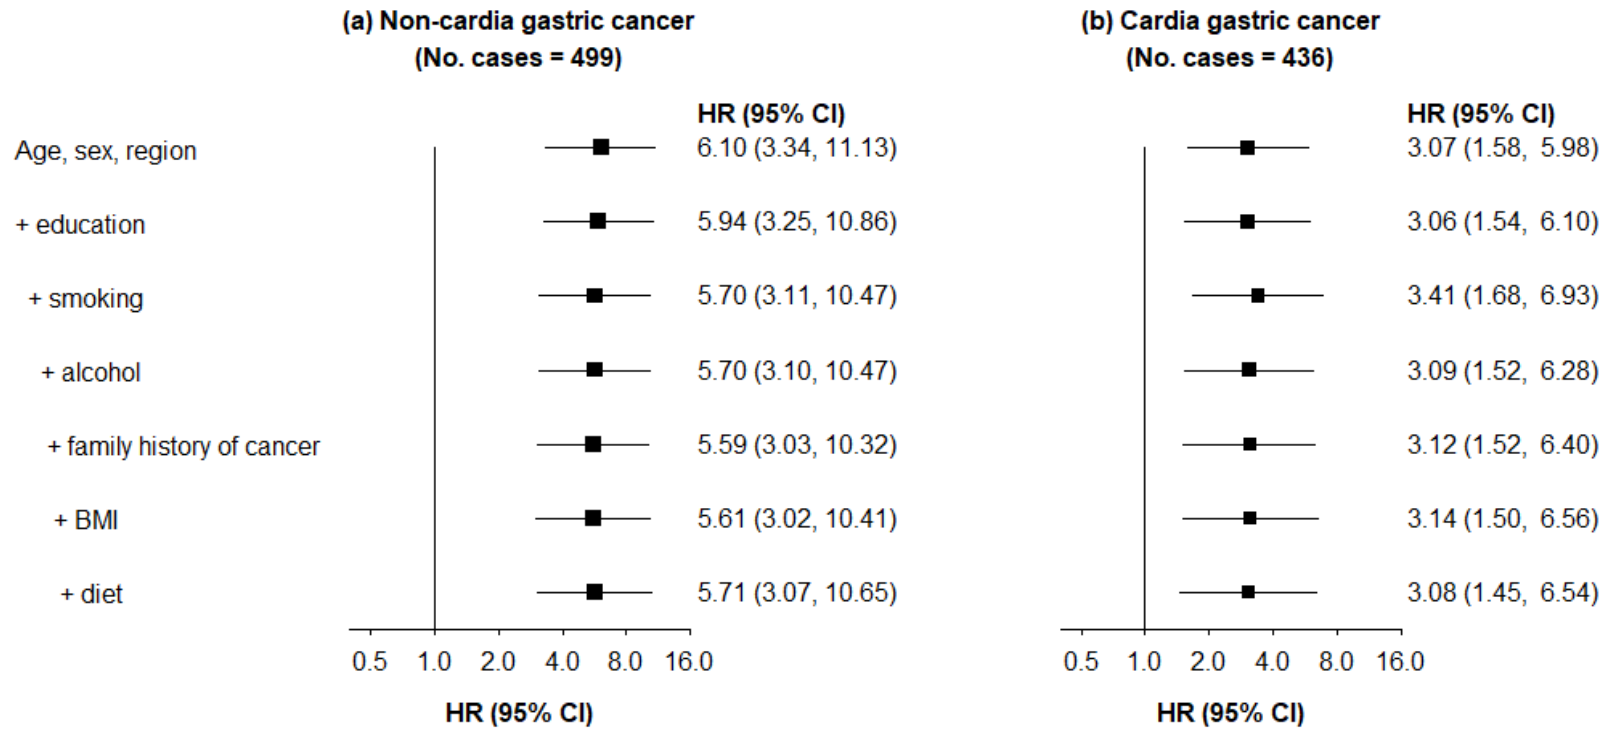

**eFigure 4. Associations of *H. pylori* infection with risks of (a) non-cardia, and (b) cardia gastric cancer, in selected population subgroups**

The Borgan III method was used to estimate HRs, with time in study as the time scale, and adjustment for age, sex, area and education in the model. The solid squares represent HRs, and the horizontal lines represent 95% CIs. The area of the squares is inversely proportional to the variance of the log HRs. The solid diamond represents overall HR.

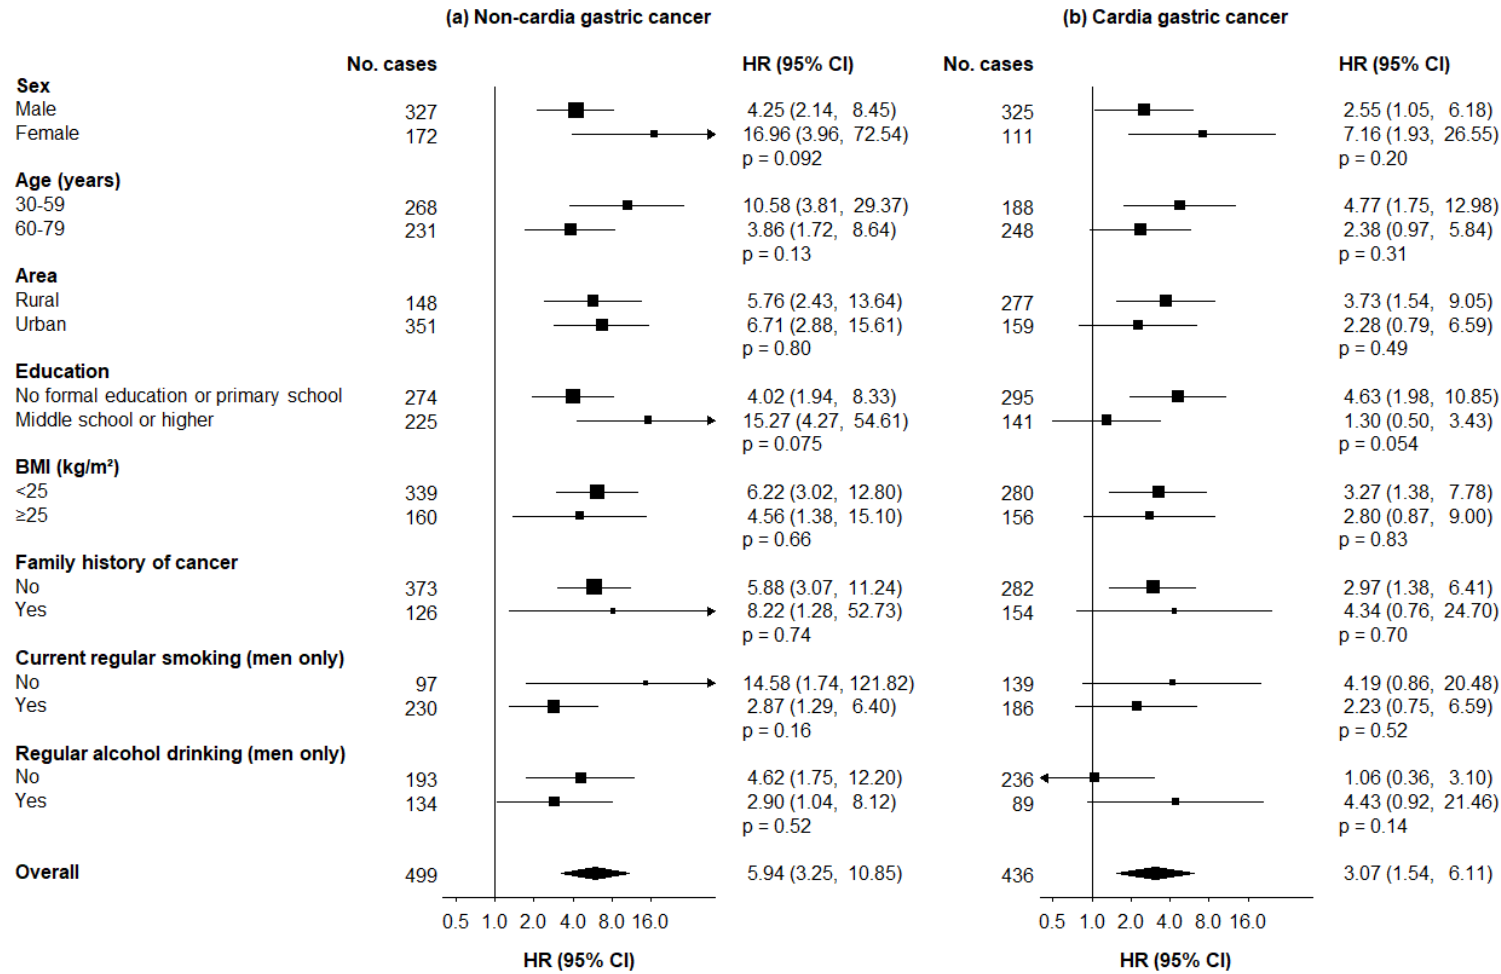

**eTable 6. Sero-prevalence and associations of *H. pylori* infection, defined by 'clinical criteria', with risks of gastric cancer**

| Type      | Sero-positive (%) | HR (95% CI) *    |
|-----------|-------------------|------------------|
| Subcohort | 57.6              | Ref.             |
| NCGC      | 83.8              | 4.68 (3.13-6.98) |
| CGC       | 79.6              | 2.36 (1.42-3.94) |

\* Adjusted for age, sex, area and education

**eFigure 5: Associations of sero-positivity of multiple key *H. pylori* biomarkers with risks of (a) non-cardia, and (b) cardia gastric cancer**

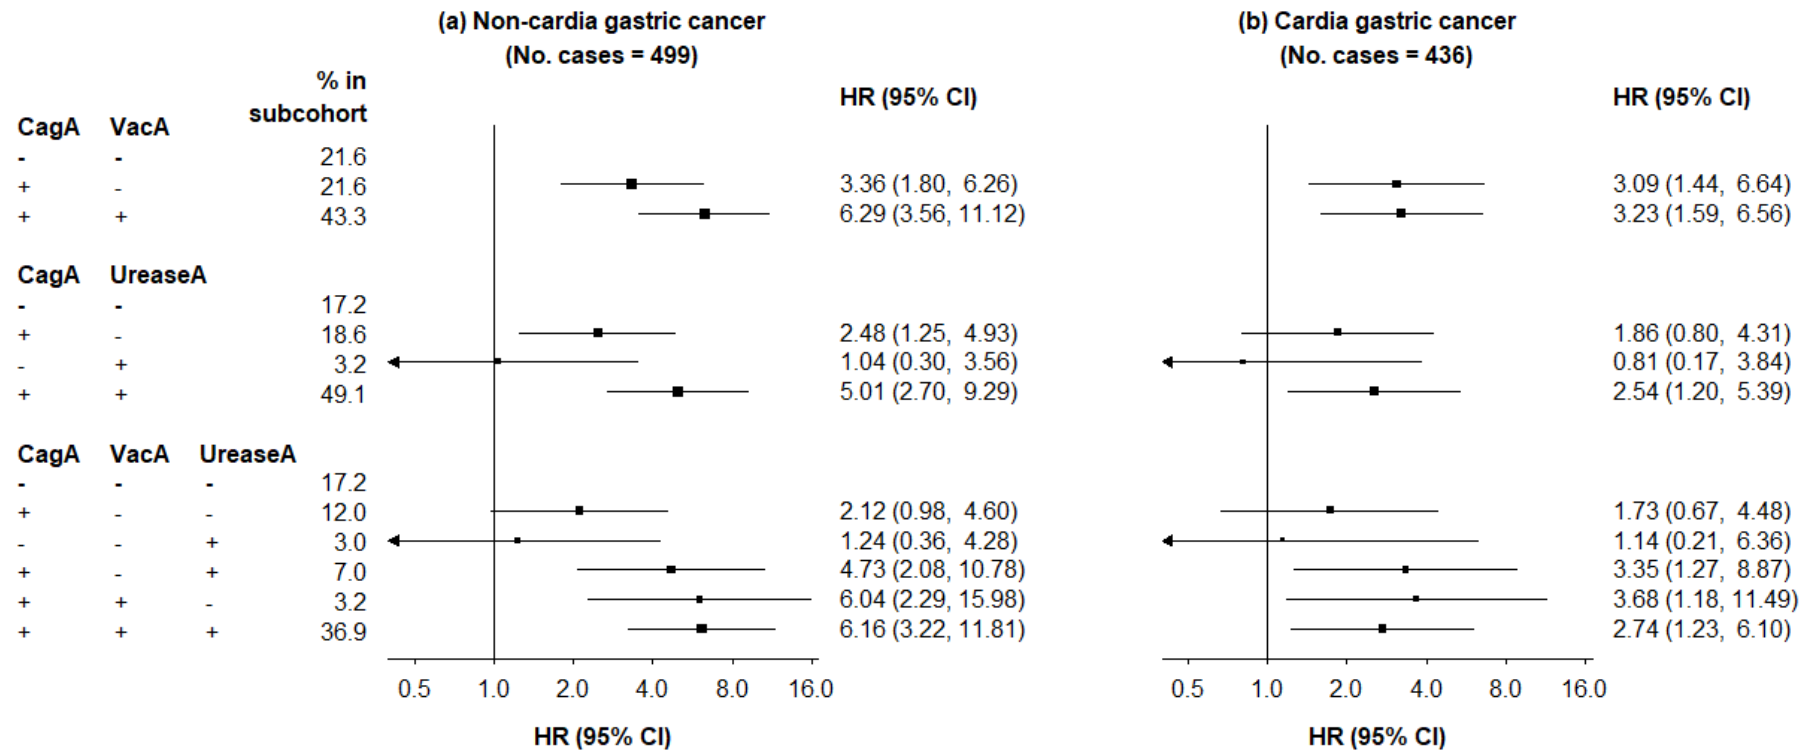

eFigure 6. Associations of *H. pylori* infection, overall and by individual biomarkers, with risk of oesophageal adenocarcinoma

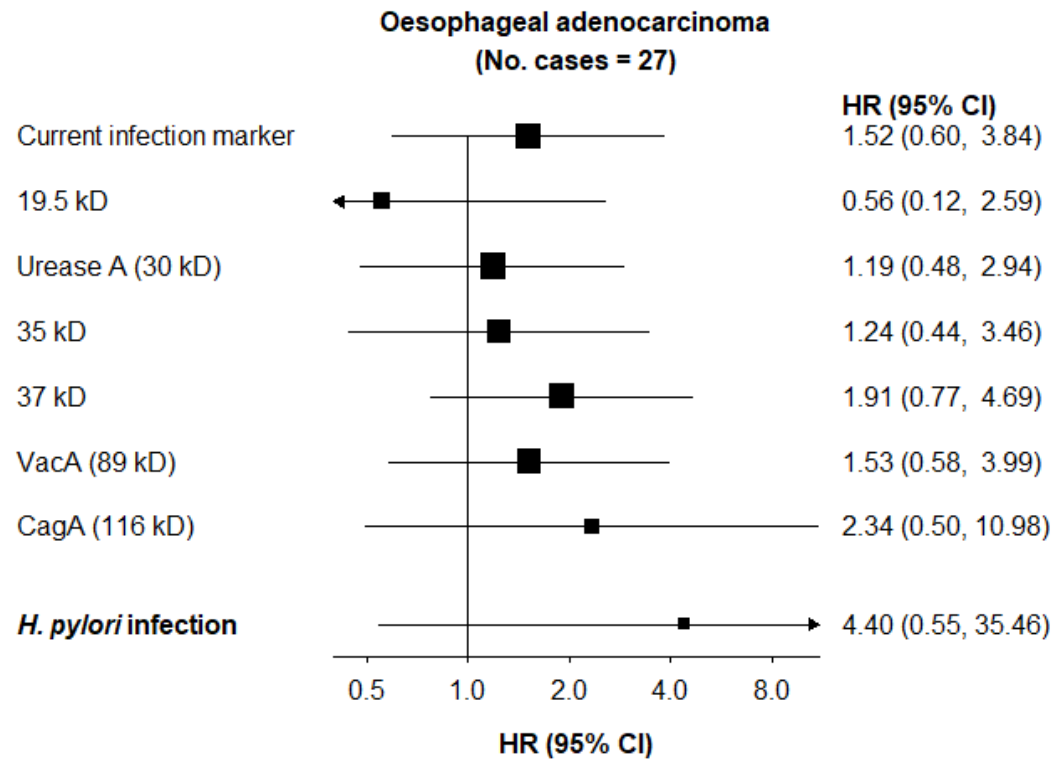

**eTable 7. Associations of *H. pylori* infection with risks of non-cardia and cardia gastric cancer by histopathological subtypes**

| <b>Pathological subtype</b> | <b>No. of cases</b> | <b>HR (95%CI) *</b> |
|-----------------------------|---------------------|---------------------|
| <b>NCGC</b>                 |                     |                     |
| Adenocarcinoma              | 338                 | 6.15 (2.95, 12.78)  |
| Non-adenocarcinoma          | 48                  | 10.03 (1.26, 80.18) |
| Unknown                     | 113                 | 4.78 (1.75, 13.02)  |
| <b>CGC</b>                  |                     |                     |
| Adenocarcinoma              | 98                  | 1.91 (0.75, 4.90)   |
| Non-adenocarcinoma          | 16                  | 2.73 (0.33, 22.62)  |
| Unknown                     | 321                 | 3.77 (1.72, 8.28)   |

\* Adjusted for age, sex, area and education

**eFigure 7. Associations of *H. pylori* infection with risks of non-cardia and cardia gastric cancer and oesophageal adenocarcinoma, with sero-ambiguous results included either as (a) sero-negative, or (b) sero-positive**

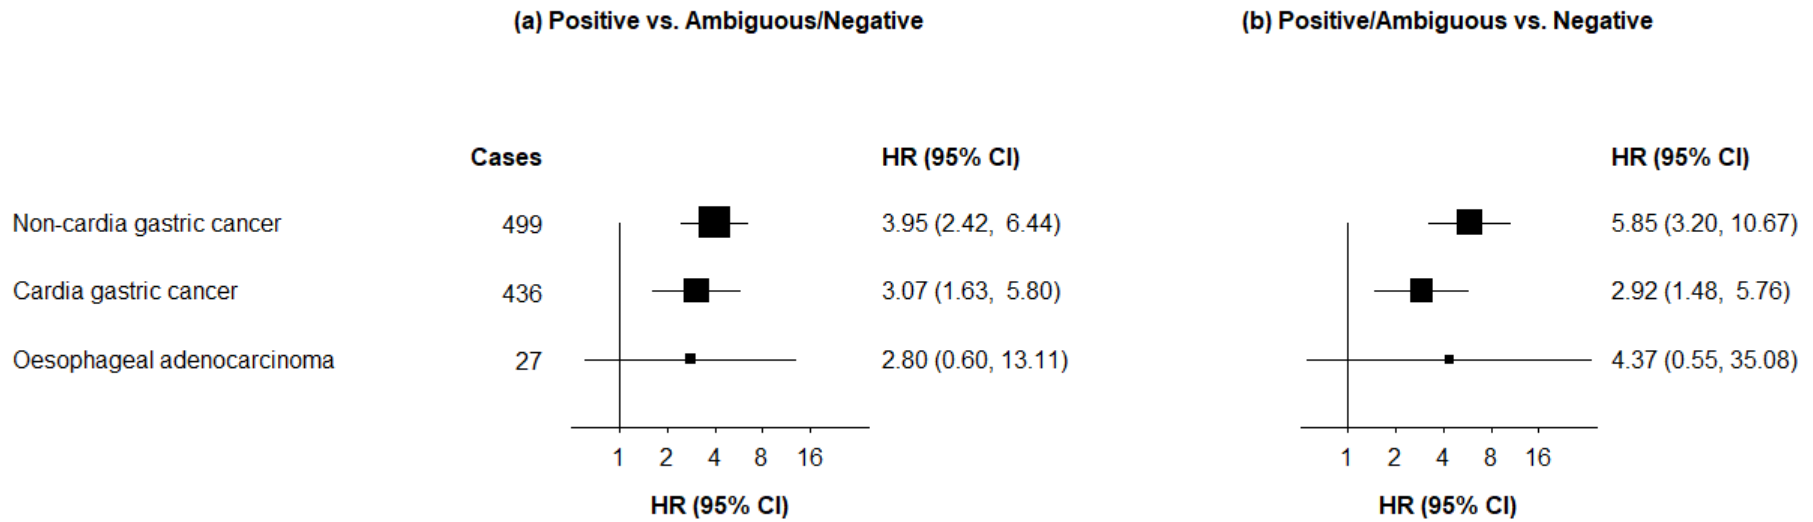



**eFigure 8. Associations of *H. pylori* infection, overall and by individual biomarkers, with risk of cardia gastric cancer (adjudicated cases only)**

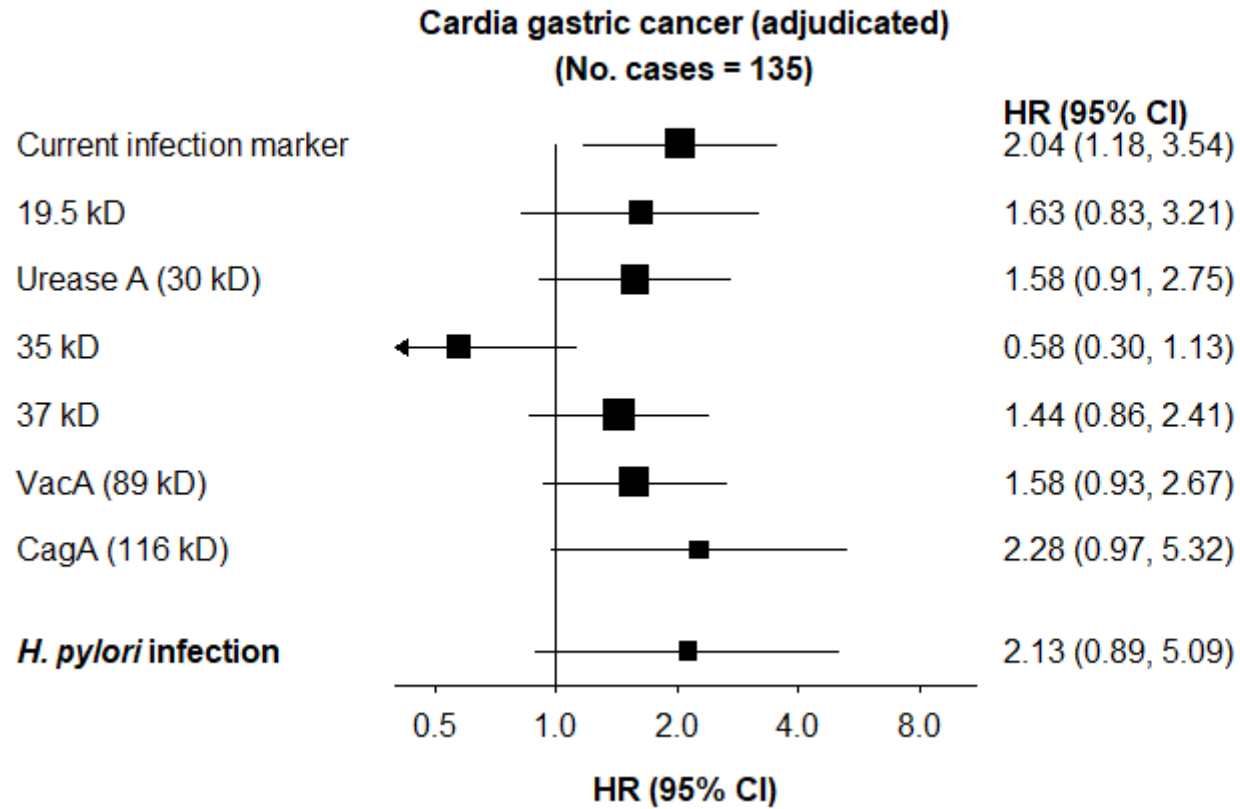

**eTable 8. The estimated numbers of cases attributable to *H. pylori* in China, from incremental exclusion of follow-up years data**

| <b>Follow-up years exclusion</b> | <b>Cancer</b> | <b>Sero-positive (%)</b> | <b>HR (95% CI)*</b> | <b>PAF (%)</b> | <b>Attributable cases</b> |
|----------------------------------|---------------|--------------------------|---------------------|----------------|---------------------------|
| <b>3 years</b>                   | <b>NCGC</b>   | 95.6                     | 8.62 (4.20, 17.68)  | 84.5           | 291,956                   |
|                                  | <b>CGC</b>    | 93.3                     | 3.62 (1.73, 7.55)   | 66.7           | 73,666                    |
| <b>4 years</b>                   | <b>NCGC</b>   | 95.4                     | 8.00 (3.78, 16.95)  | 83.4           | 288,453                   |
|                                  | <b>CGC</b>    | 93.4                     | 3.68 (1.73, 7.83)   | 68.0           | 75,139                    |
| <b>5 years</b>                   | <b>NCGC</b>   | 94.7                     | 6.12 (2.87, 13.07)  | 79.3           | 274,003                   |
|                                  | <b>CGC</b>    | 92.8                     | 3.50 (1.59, 7.69)   | 66.4           | 73,299                    |

\* HRs estimated using the Borgan III estimator and adjusted for age, sex, area and education
